# Supplementary material for: Stream water sourcing from high elevation snowpack inferred from stable isotopes of water: A novel application of d-excess values
Source: Copernicus journal article supplement (doi:10.5194/egusphere-2023-1934), 2023-09-06
Supplement: Supplementary file 1 [file egusphere-2023-1934-supplement.pdf]

508 **Supplementary material**

509

510 *Hydrology and Earth System Sciences*

511 Supporting Information for

512 **Stream water sourcing from high elevation snowpack inferred from**  
513 **stable isotopes of water: A novel application of *d-excess* values**

514 Matthias Sprenger<sup>1\*</sup>, Rosemary W.H. Carroll<sup>2</sup>, David Marchetti<sup>3</sup>, Carl Bern<sup>4</sup>, Wendy Brown<sup>5</sup>, Alexander Newman<sup>5</sup>,  
515 Curtis Beutler<sup>5</sup>, Kenneth H. Williams<sup>1,5</sup>

516 <sup>1</sup>Lawrence Berkeley National Laboratory, Berkeley, CA, USA

517 <sup>2</sup>Desert Research Institute, Reno, NV, USA

518 <sup>3</sup>Western Colorado University, Gunnison, CO, USA

519 <sup>4</sup>U.S. Geological Survey, Denver, CO, USA

520 <sup>5</sup>Department of Environmental Systems Science, ETH Zurich, Zurich, Switzerland<sup>6</sup>Rocky Mountain Biological  
521 Laboratory, Crested Butte, CO, USA

522 \*Corresponding author: msprenger@lbl.gov

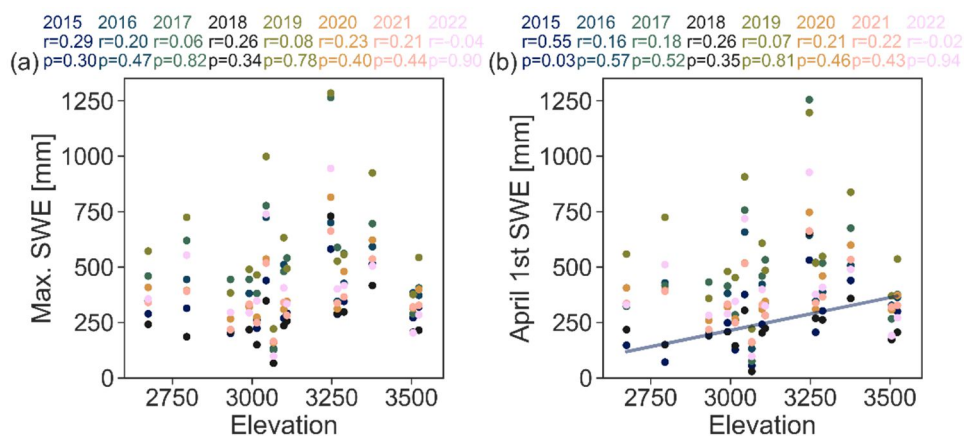

523

524 **Suppl. Fig. 1 (a) Relation between maximum snow water equivalent (SWE) at the 15 SNOTEL sites in the Gunnison River**  
525 **basin and the elevation of the SNOTEL sites for the years 2015 to 2022. (b) same as in (a), but with SWE on April 1<sup>st</sup>. Given**  
526 **are the Pearson correlation coefficients for each year and the years are color coded (data from**  
527 **<https://wcc.sc.egov.usda.gov/reportGenerator/>).**

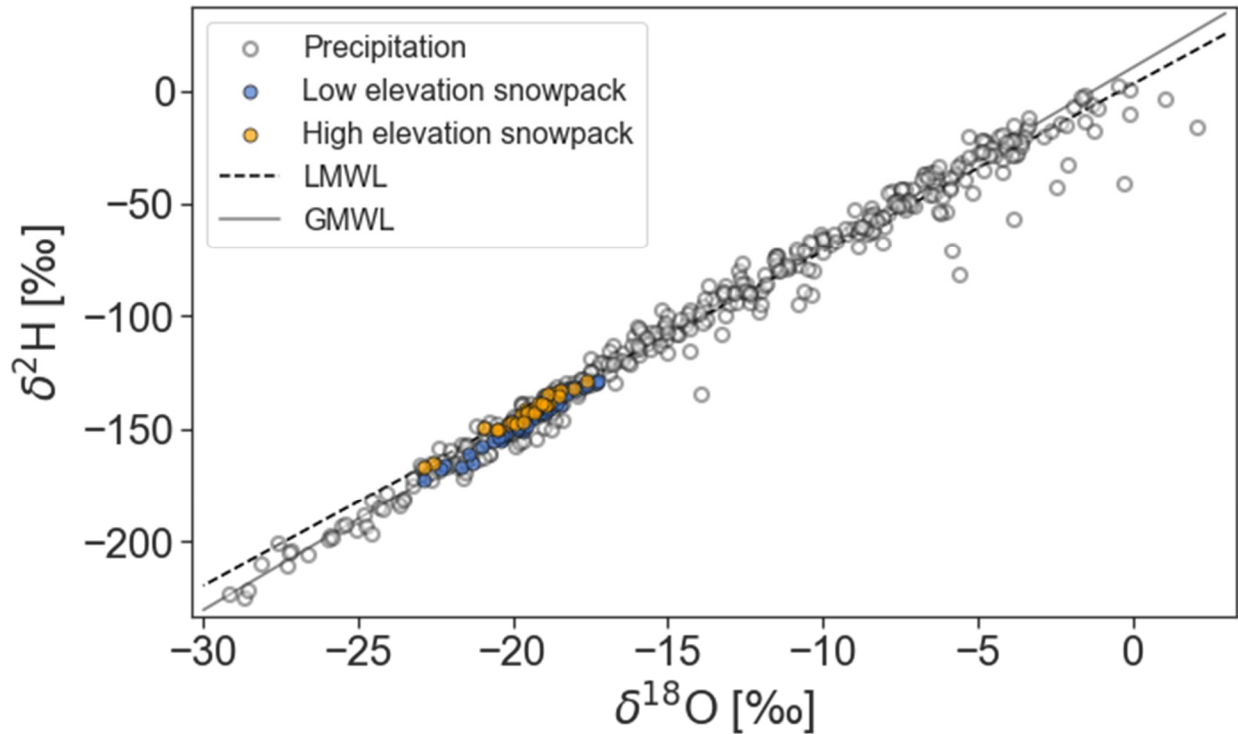

528

529 Suppl. Fig. 2 Precipitation samples from 2015 to 2022 (white points) and snowpack sampled at sites <3200 m a.s.l. (“Low  
 530 elevation”, blue) and sites above >3200 m a.s.l. (“High elevation”, orange). Also shown are the Global Meteoric Water Line  
 531 (GMWL:  $\delta^2\text{H} = 8.2 \delta^{18}\text{O} + 11.27$ , Rozanski et al. (1993)) and the Local Meteoric Water Line (LMWL:  $\delta^2\text{H} = 7.4$   
 532  $\delta^{18}\text{O} + 2.4$ , Carroll et al. (2022b)).

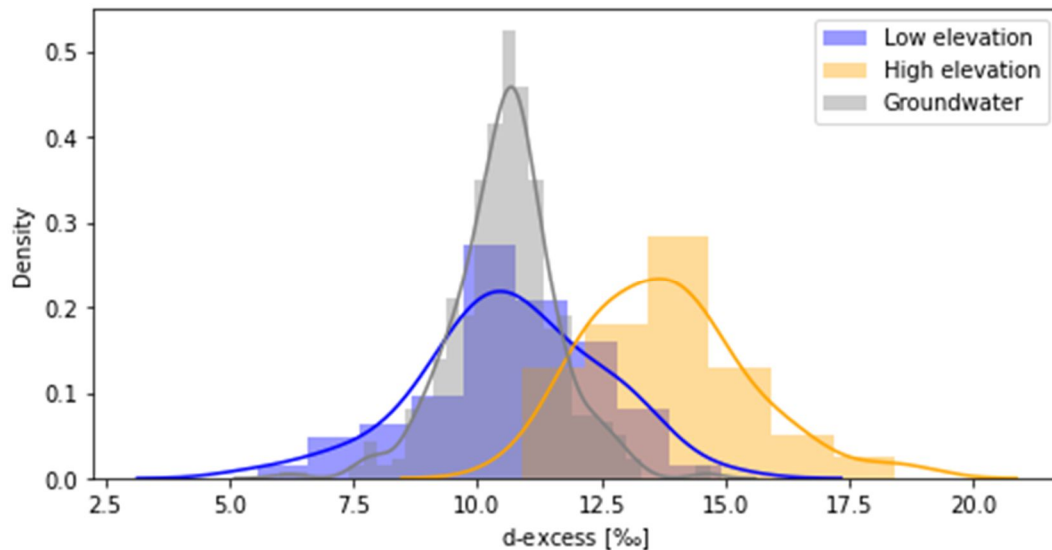

533

534 Suppl. Fig. 3 Histogram showing the distribution of snowpit d-excess for the sites <3200 m a.s.l. (“Low elevation”, blue),  
 535 sites above >3200 m a.s.l. (“High elevation”, orange), and groundwater sampled at five wells between 2015 and 2022 (grey).  
 536 The mean values for the low and high elevation snowpack (10.7 ‰ and 13.8 ‰, respectively) are significantly different  
 537 ( $p < 0.0001$ ,  $t = -8.1$ ) according to the t-test. The mean groundwater d-excess (10.5 ‰) is not significantly different from the  
 538 low elevation snowpack.

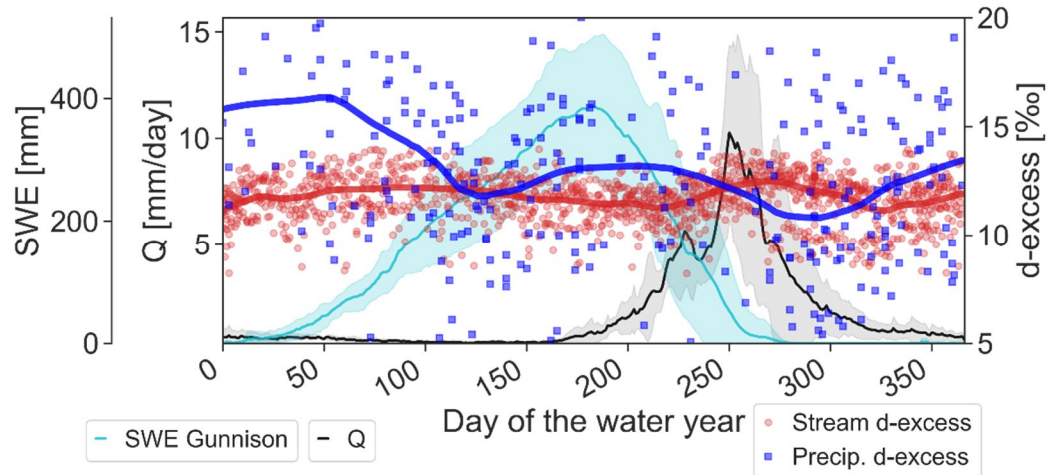

539

540 **Suppl. Fig. 4** Median annual dynamics of snow water equivalent (SWE) at the Gunnison SNOTEL stations (cyan) and East  
 541 River streamflow (Q, black) from water year 2015 to 2022 with semitransparent area representing the range. The d-excess  
 542 of all stream water at East River (red) and precipitation (blue) samples collected between water year 2015 and 2022. The  
 543 red and blue lines represent a lowess filter to show any trends in the data.

544

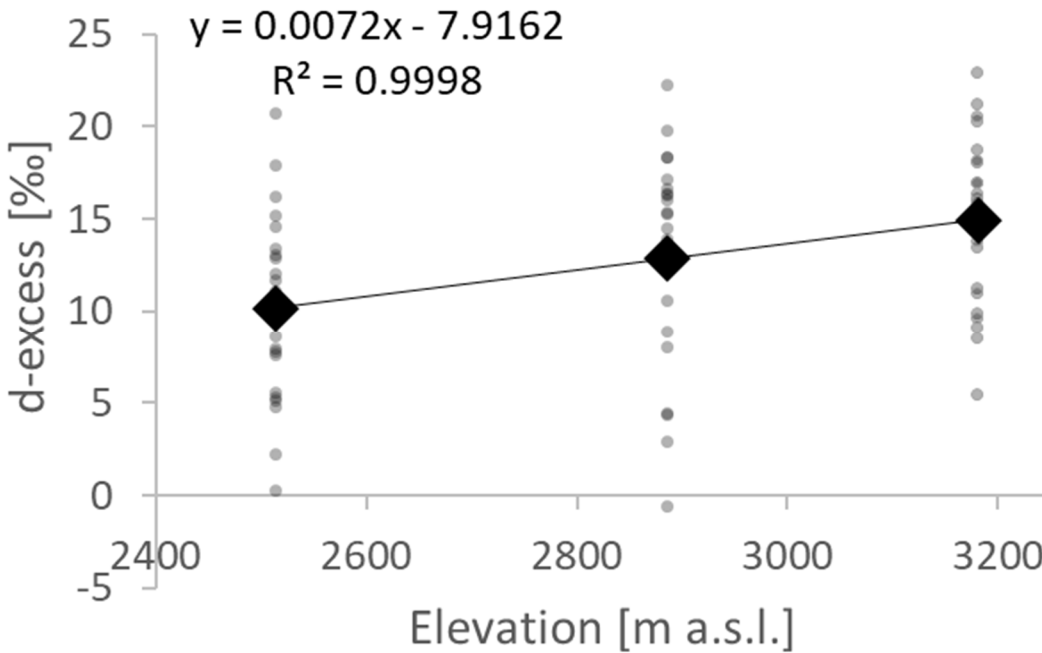

545

546 **Suppl. Fig. 5** The d-excess of winter precipitation from samples collected between November and April during the water  
 547 years 2021 and 2022 at the locations Estess (2513 m), Mount Crested Butte (2885 m) and Irwin Barn (3181 m). The black  
 548 diamonds show the mean values and half-transparent dots are individual samples. The regression line shows the d-excess  
 549 lapse rate of 0.7 ‰/100 m.

550

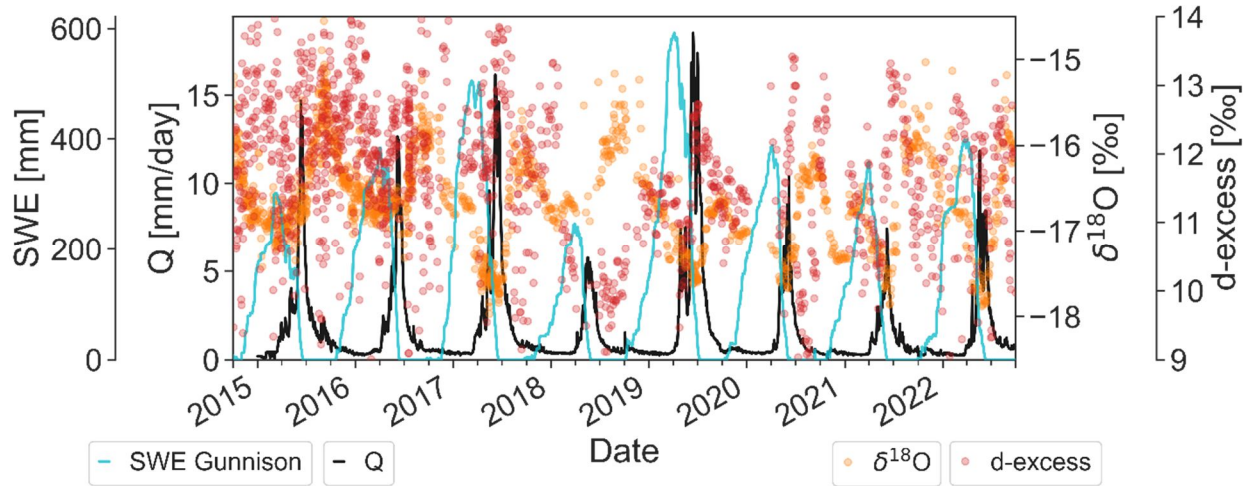

551

552 **Suppl. Fig. 6** Snow water equivalent (SWE) at the Gunnison SNOTEL stations (cyan line), streamflow (Q, black line) at the  
 553 East River, as well as the  $\delta^{18}\text{O}$  (orange points) and *d-excess* (red points) of the stream water sampled at Pumphouse for the  
 554 water years 2015 to 2022.

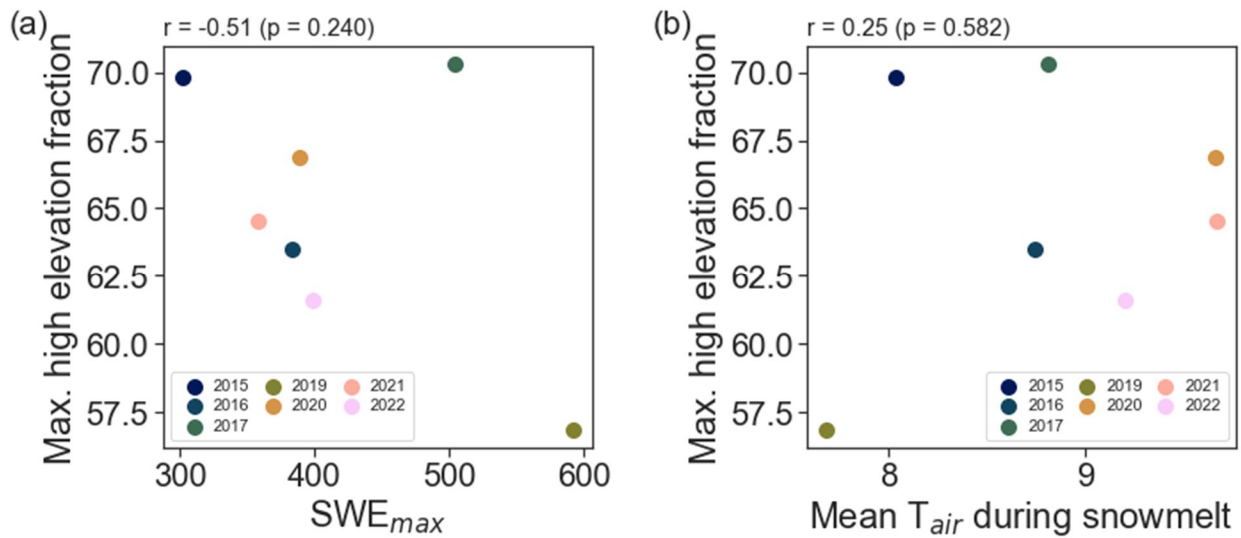

555

556 **Suppl. Fig. 7** Relation between maximum fraction of high elevation snowpack contributions to the snowmelt runoff and the  
 557 maximum snow water equivalent (in a) and mean air temperature during the snowmelt period (in b).

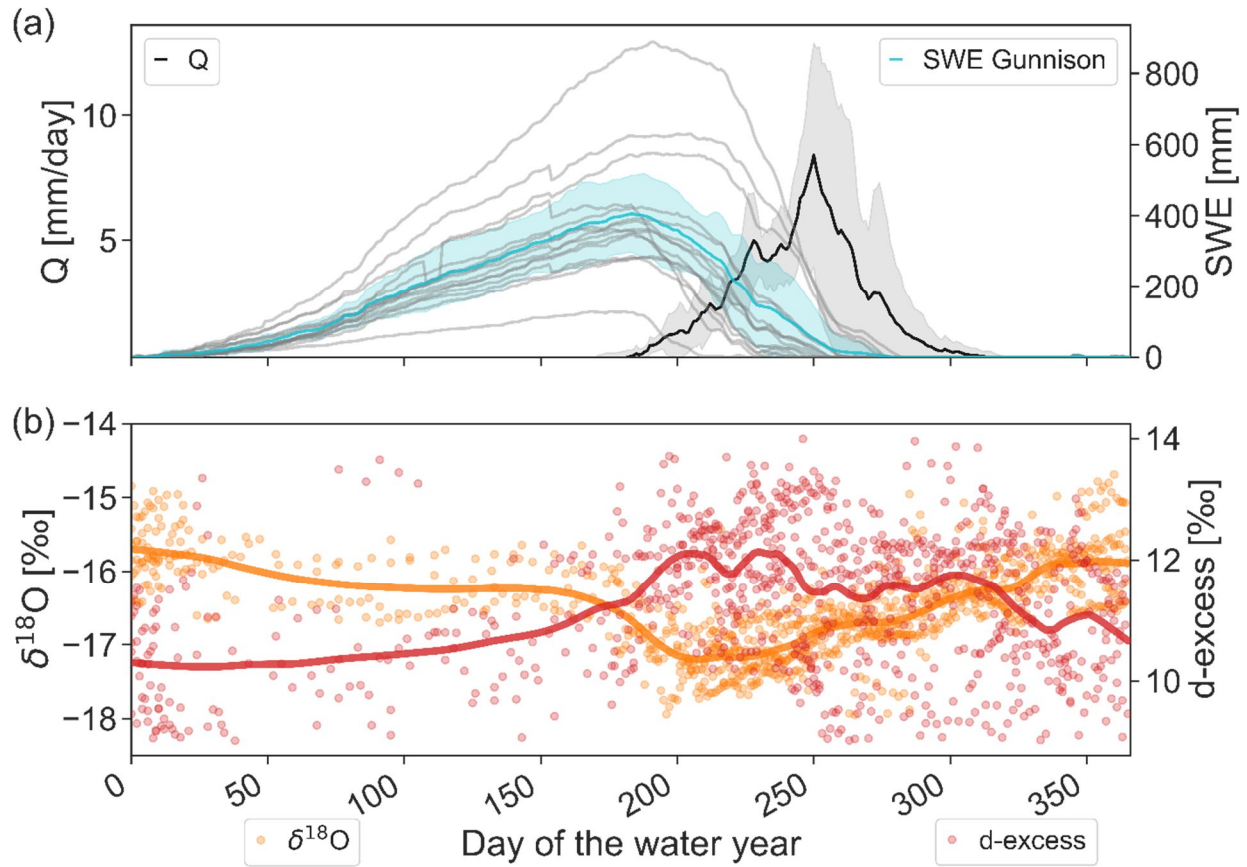

558

559 Suppl. Fig. 8 (a) Median annual dynamics of Coal Creek streamflow (Q, black) and snow water equivalent (SWE) at the  
 560 individual SNOTEL sites within the Gunnison River catchment (grey) and the average of all sites (cyan) from water year  
 561 2016 to 2022 with semitransparent grey and cyan area representing the standard deviation of Q and SWE, respectively. (b)  
 562 The  $\delta^{18}\text{O}$  (orange) and  $d$ -excess (red) of all stream water samples collected between water year 2016 and 2022 from the East  
 563 River at the Pumphouse location. The orange and red lines are a LOWESS fit to the data points.

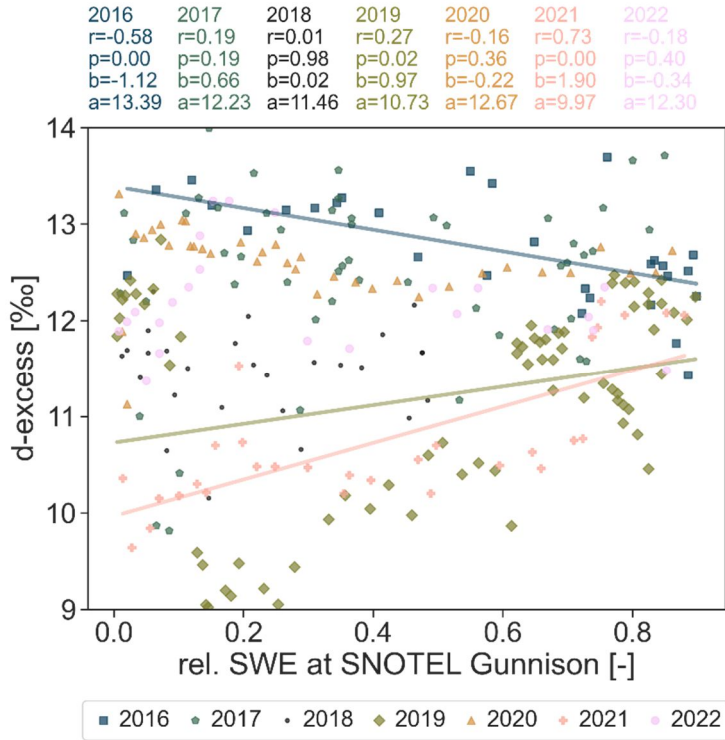

564

565 **Suppl. Fig. 9** The *d-excess* of Coal Creek stream water during snowmelt for seven individual years, shown as a function of  
 566 relative SWE measured at the SNOTEL stations across the Gunnison River catchment at the time of sampling. For each  
 567 year, the Pearson correlation ( $r$ ) and the associated significance level ( $p$ ) are given as well as the intercept ( $a$ ) and slope ( $b$ )  
 568 of the regression.

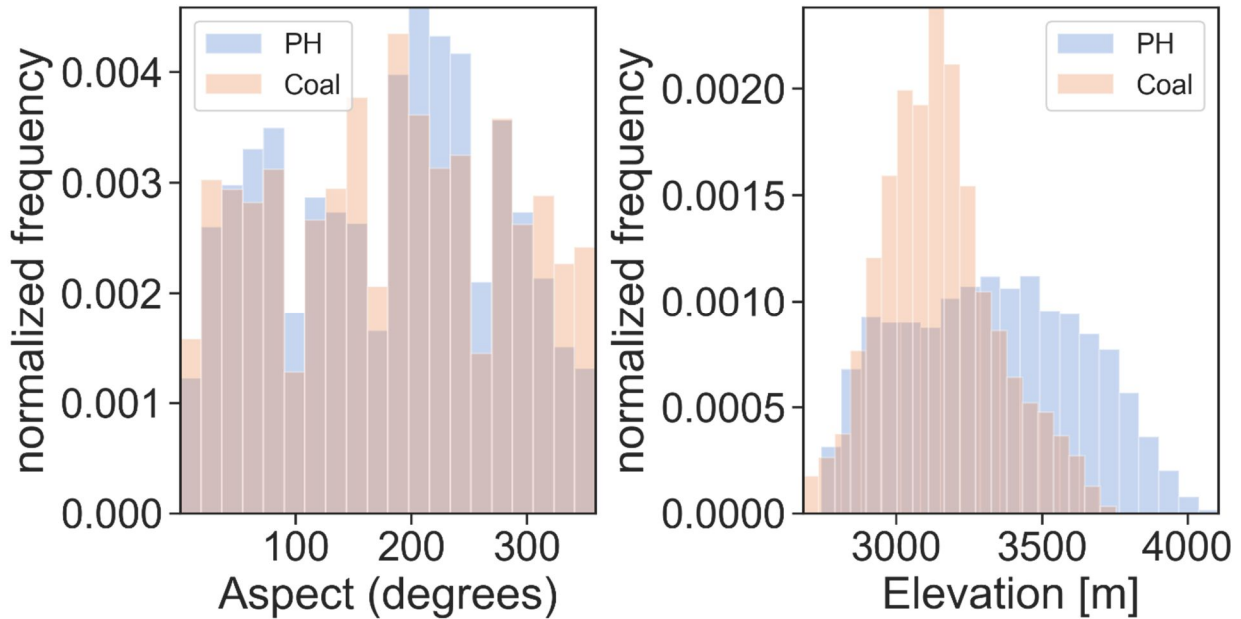

569

570 **Suppl. Fig. 10** Distribution of aspect (left) and elevation (right) across the East River catchment defined at Pumphouse (PH,  
 571 blue) and Coal Creek (Coal, orange).

572 **Suppl. Table 1** SNOTEL sites located in the Gunnison River Basin (data from  
 573 <https://wcc.sc.egov.usda.gov/reportGenerator/>).

| <b>Station Id</b> | <b>Station Name</b> | <b>Elevation (m)</b> | <b>Latitude</b> | <b>Longitude</b> | <b>County Name</b> |
|-------------------|---------------------|----------------------|-----------------|------------------|--------------------|
| 380               | Butte               | 3108.96              | 38.8944         | -106.95          | Gunnison           |
| 1059              | Cochetopa Pass      | 3066.59              | 38.1627         | -106.6           | Saguache           |
| 409               | Columbine Pass      | 2795.32              | 38.4182         | -108.38          | Montrose           |
| 538               | Idarado             | 2990.7               | 37.9339         | -107.68          | Ouray              |
| 618               | Mc Clure Pass       | 2674.32              | 39.129          | -107.29          | Gunnison           |
| 622               | Mesa Lakes          | 3099.21              | 39.0574         | -108.06          | Mesa               |
| 675               | Overland Res.       | 3015.39              | 39.0904         | -107.64          | Delta              |
| 680               | Park Cone           | 2932.48              | 38.8198         | -106.59          | Gunnison           |
| 682               | Park Reservoir      | 3044.04              | 39.0443         | -107.88          | Delta              |
| 701               | Porphyry Creek      | 3288.18              | 38.4886         | -106.34          | Gunnison           |
| 713               | Red Mountain Pass   | 3377.18              | 37.8917         | -107.71          | San Juan           |
| 1128              | Sargents Mesa       | 3504.9               | 38.2856         | -106.37          | Saguache           |
| 737               | Schofield Pass      | 3247.03              | 39.0147         | -107.05          | Gunnison           |
| 762               | Slumgullion         | 3523.49              | 37.9908         | -107.2           | Hinsdale           |
| 1141              | Upper Taylor        | 3266.54              | 38.9907         | -106.75          | Gunnison           |

574

575

| <b>Station Id</b> | <b>Station Name</b> | <b>Elevation (m)</b> | <b>Latitude</b> | <b>Longitude</b> | <b>County Name</b> |
|-------------------|---------------------|----------------------|-----------------|------------------|--------------------|
| 1030              | Arapaho Ridge       | 3345.48              | 40.351          | -106.38          | Grand              |
| 1061              | Bear River          | 2777.34              | 40.0615         | -107.01          | Routt              |
| 1041              | Beaver Ck Village   | 2610.61              | 39.5987         | -106.51          | Eagle              |
| 335               | Berthoud Summit     | 3448.51              | 39.8036         | -105.78          | Grand              |
| 345               | Bison Lake          | 3341.83              | 39.7646         | -107.36          | Garfield           |
| 913               | Buffalo Park        | 2819.1               | 40.2284         | -106.6           | Grand              |
| 1101              | Chapman Tunnel      | 3078.48              | 39.2621         | -106.63          | Pitkin             |
| 408               | Columbine           | 2794.1               | 40.3959         | -106.6           | Jackson            |
| 415               | Copper Mountain     | 3207.41              | 39.4892         | -106.17          | Summit             |
| 1120              | Elliot Ridge        | 3215.34              | 39.8638         | -106.42          | Summit             |
| 485               | Fremont Pass        | 3452.16              | 39.3801         | -106.2           | Summit             |
| 505               | Grizzly Peak        | 3395.17              | 39.6465         | -105.87          | Summit             |
| 542               | Independence Pass   | 3230.27              | 39.0754         | -106.61          | Pitkin             |
| 547               | Ivanhoe             | 3212.9               | 39.2923         | -106.55          | Pitkin             |
| 970               | Jones Pass          | 3177.84              | 39.7645         | -105.91          | Grand              |
| 556               | Kiln                | 2933.4               | 39.3172         | -106.62          | Pitkin             |
| 565               | Lake Irene          | 3255.87              | 40.4145         | -105.82          | Grand              |
| 607               | Lynx Pass           | 2718.51              | 40.0783         | -106.67          | Routt              |
| 618               | Mc Clure Pass       | 2674.32              | 39.129          | -107.29          | Gunnison           |



|      |                   |         |         |         |          |
|------|-------------------|---------|---------|---------|----------|
| 1040 | Mccoys Park       | 2900.48 | 39.6023 | -106.54 | Eagle    |
| 622  | Mesa Lakes        | 3099.21 | 39.0574 | -108.06 | Mesa     |
| 1014 | Middle Fork Camp  | 2733.75 | 39.7957 | -106.03 | Grand    |
| 658  | Nast Lake         | 2661.21 | 39.297  | -106.61 | Pitkin   |
| 669  | North Lost Trail  | 2809.95 | 39.0782 | -107.14 | Gunnison |
| 675  | Overland Res.     | 3015.39 | 39.0904 | -107.64 | Delta    |
| 682  | Park Reservoir    | 3044.04 | 39.0443 | -107.88 | Delta    |
| 688  | Phantom Valley    | 2756.92 | 40.398  | -105.85 | Grand    |
| 737  | Schofield Pass    | 3247.03 | 39.0147 | -107.05 | Gunnison |
| 802  | Summit Ranch      | 2856.28 | 39.718  | -106.16 | Summit   |
| 842  | Vail Mountain     | 3142.49 | 39.6177 | -106.38 | Eagle    |
| 869  | Willow Creek Pass | 2902.61 | 40.3473 | -106.1  | Grand    |
